# Supplementary material for: Titanium dioxide-modified nanosized TS-1 zeolite-supported phosphotungstic acid as a catalyst for deep catalytic oxidative desulfurization of fuel oil
Source: Royal Society of Chemistry journal article supplement (doi:10.1039/d3nj01058a), 2023-01-01
Supplement: d3nj01058a1.pdf [file d3nj01058a1.pdf]

## Supporting Information

Mingli Bi,<sup>a</sup> Ying Guo,<sup>a</sup> Siyue Wang,<sup>a</sup> Bingxue Zhang,<sup>b</sup> Yu'ni Jiang,<sup>a</sup>  
Haonan Li,<sup>a</sup> Qingxin Xu,<sup>a</sup> Lidong Chen,<sup>\*a</sup> Qi Zhao<sup>\*a</sup> and Na Han<sup>\*c</sup>

- a. Faculty of Chemistry and Chemical Engineering, Liaoning Normal University, Dalian, 110629, Liaoning, P.R. China, E-mail: lidongchhm0809@163.com; qizhao@lnnu.edu.cn
- b. Public Technology Center, Ningbo Institute of Materials Technology and Engineering (NIMTE), Chinese Academy of Sciences (CAS), Ningbo, 315201, P.R. China
- c. Institute of Functional Nano and Soft Materials (FUNSOM), Jiangsu Key Laboratory for Carbon-Based Functional Materials and Devices, Soochow University, Suzhou 215123, P.R. China, E-mail: hanna@suda.edu.cn

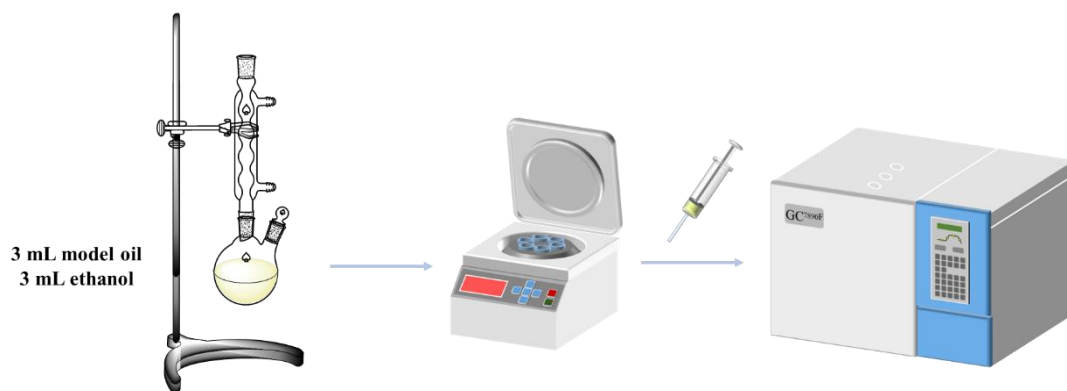

**Fig. S1** ODS experimental device diagram

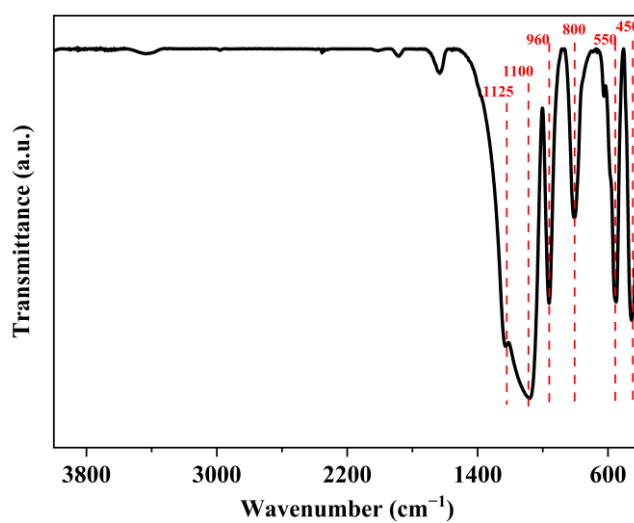

**Fig. S2** FT-IR spectra of HPW/TS-1@TiO<sub>2</sub>-0.05

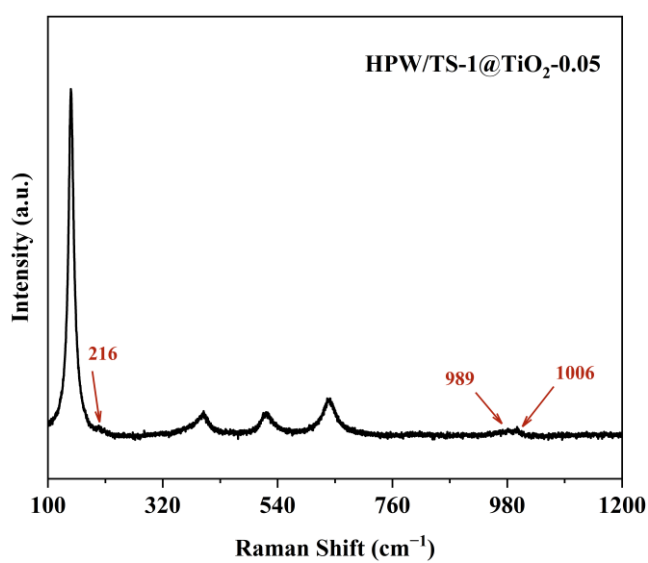

**Fig. S3** Raman spectra of HPW/TS-1@TiO<sub>2</sub>-0.05

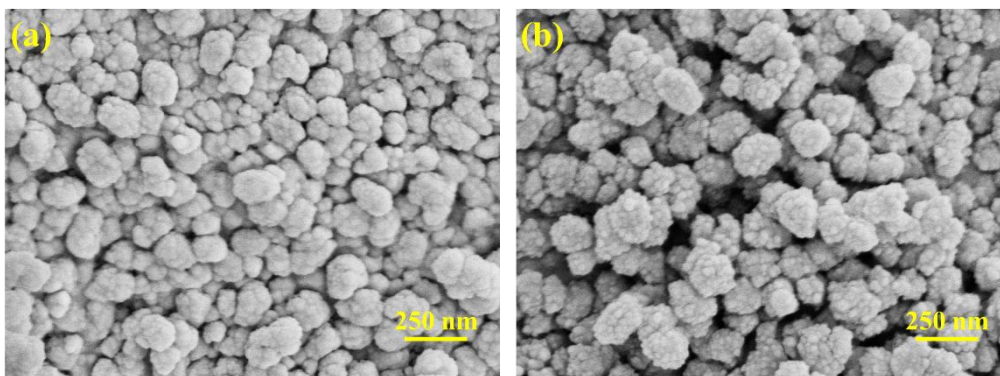

**Fig. S4** Scanning electron micrographs of (a)TS-1@TiO<sub>2</sub>-0.025 and (b) TS-1@TiO<sub>2</sub>-1

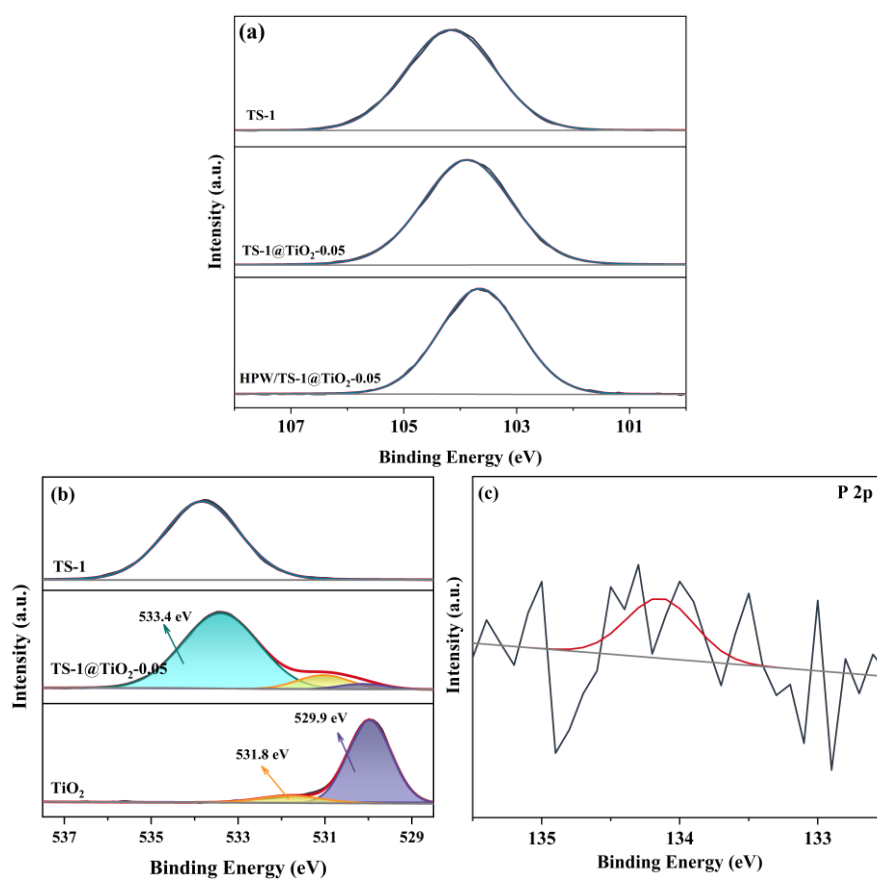

**Fig. S5** XPS spectra of samples: (a) Si 2p, (b) O 1s and (c) P 2p

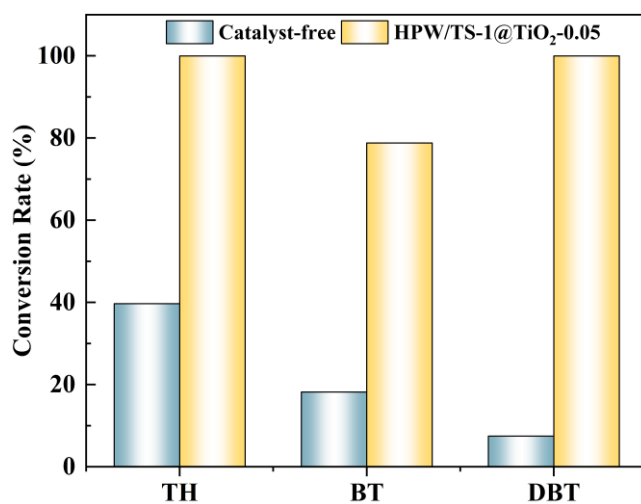

**Fig. S6** The ODS performance on different sulfides using HPW/Ts-1@TiO<sub>2</sub>-0.05 and catalyst-free. Reaction conditions:  $t = 90$  min,  $T = 60$  °C, HPW/Ts-1@TiO<sub>2</sub>-0.05 dosage = 0.06 g, O/S molar ratio = 12.

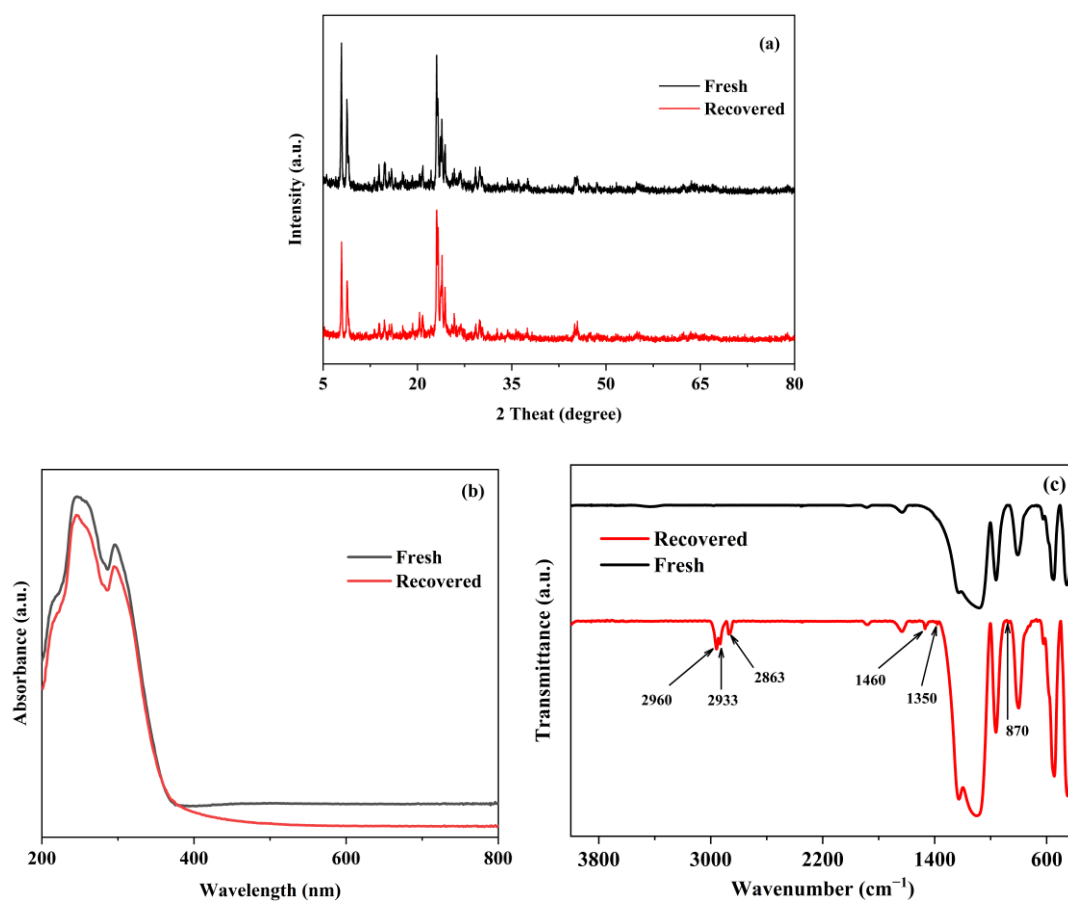

**Fig. S7** XRD pattern (a) UV-vis spectra (b) and FT-IR spectra (c) of the recovered HPW/Ts-1@TiO<sub>2</sub>-0.05

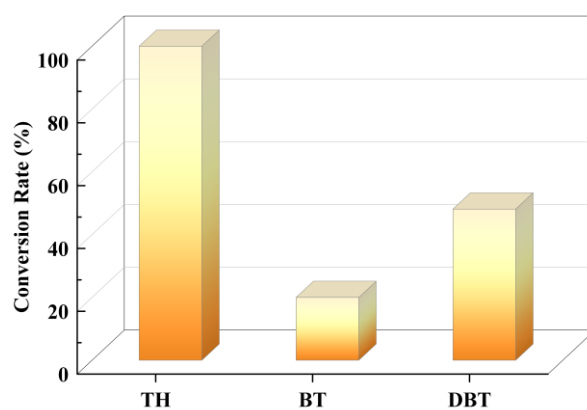

**Fig. S8** ODS efficiencies on different sulfides over TS-1 catalyst.

Reaction conditions:  $t = 120$  min,  $T = 70$  °C, TS-1 dosage = 0.06 g, O/S molar ratio = 12.

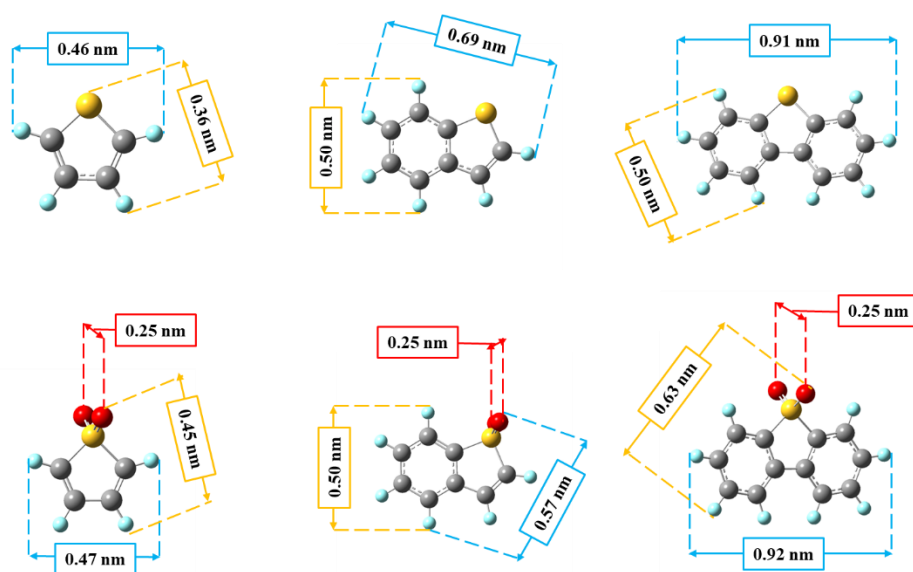

**Fig. S9** Ball and stick models of TH, BT, DBT and corresponding sulphone.

Blue: H, Yellow: S, Gray: C and Red: O.

**Table S1** Comparison of the reaction data with other reported methods

| Catalysts                                                | Model oil        | Solvent                          | Reaction conditions                                                                                                                               | Conversion of TH | Conversion of BT | Conversion of DBT | Ref       |
|----------------------------------------------------------|------------------|----------------------------------|---------------------------------------------------------------------------------------------------------------------------------------------------|------------------|------------------|-------------------|-----------|
| TS-1                                                     | <i>n</i> -octane | H <sub>2</sub> O                 | $C_{\text{Cat.}} = 10 \text{ g/L}$<br>$T = 60 \text{ }^\circ\text{C}$<br>$t = 30 \text{ min}$<br>$n (\text{H}_2\text{O}_2/\text{sulfur}) = 4:1$   | 97%              | —                | —                 | 20        |
| Hierarchical TS-1                                        | <i>n</i> -octane | CH <sub>3</sub> OH               | $C_{\text{Cat.}} = 10 \text{ g/L}$<br>$T = 60 \text{ }^\circ\text{C}$<br>$t = 120 \text{ min}$<br>$n (\text{H}_2\text{O}_2/\text{sulfur}) = 4:1$  | 81%              | 69%              | —                 | 24        |
| TiO <sub>2</sub>                                         | <i>n</i> -octane | CH <sub>3</sub> OH               | $C_{\text{Cat.}} = 6.7 \text{ g/L}$<br>$T = 60 \text{ }^\circ\text{C}$<br>$t = 60 \text{ min}$<br>$n (\text{H}_2\text{O}_2/\text{sulfur}) = 4:1$  | —                | —                | 99.6%             | 36        |
| TiO <sub>2</sub> /GC                                     | <i>n</i> -octane | —                                | $C_{\text{Cat.}} = 20 \text{ g/L}$<br>$T = 50 \text{ }^\circ\text{C}$<br>$t = 60 \text{ min}$<br>$n (\text{H}_2\text{O}_2/\text{sulfur}) = 4:1$   | —                | —                | 100%              | 31        |
| H <sub>3</sub> PW <sub>12</sub> O <sub>40</sub>          | <i>n</i> -octane | CH <sub>3</sub> CN               | $C_{\text{Cat.}} = 70 \text{ g/L}$<br>$T = 60 \text{ }^\circ\text{C}$<br>$t = 60 \text{ min}$<br>$n (\text{H}_2\text{O}_2/\text{sulfur}) = 2:1$   | —                | —                | 99.2%             | 78        |
| HPMoV <sub>2</sub> /TS-1-TPAOH@SiO <sub>2</sub> -in situ | <i>n</i> -octane | C <sub>2</sub> H <sub>5</sub> OH | $C_{\text{Cat.}} = 20 \text{ g/L}$<br>$T = 70 \text{ }^\circ\text{C}$<br>$t = 180 \text{ min}$<br>$n (\text{H}_2\text{O}_2/\text{sulfur}) = 13:1$ | 99.3%            | 45.9%            | 84.1%             | 52        |
| HPW/TS-1@TiO <sub>2</sub> -0.05                          | <i>n</i> -octane | C <sub>2</sub> H <sub>5</sub> OH | $C_{\text{Cat.}} = 20 \text{ g/L}$<br>$T = 60 \text{ }^\circ\text{C}$<br>$t = 90 \text{ min}$<br>$n (\text{H}_2\text{O}_2/\text{sulfur}) = 12:1$  | 99.9%            | 78.8%            | 99.9%             | This work |
